# Supplementary material for: Soil priming effects and involved microbial community along salt gradients
Source: Copernicus journal article supplement (doi:10.5194/bg-21-1-2024), 2024-01-02
Supplement: Supplementary file 1 [file bg-21-1-2024-supplement.pdf]

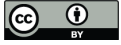

*Supplement of*

## **Soil priming effects and involved microbial community along salt gradients**

**Haoli Zhang et al.**

*Correspondence to:* Kaiyong Wang (wky20@163.com)

The copyright of individual parts of the supplement might differ from the article licence.

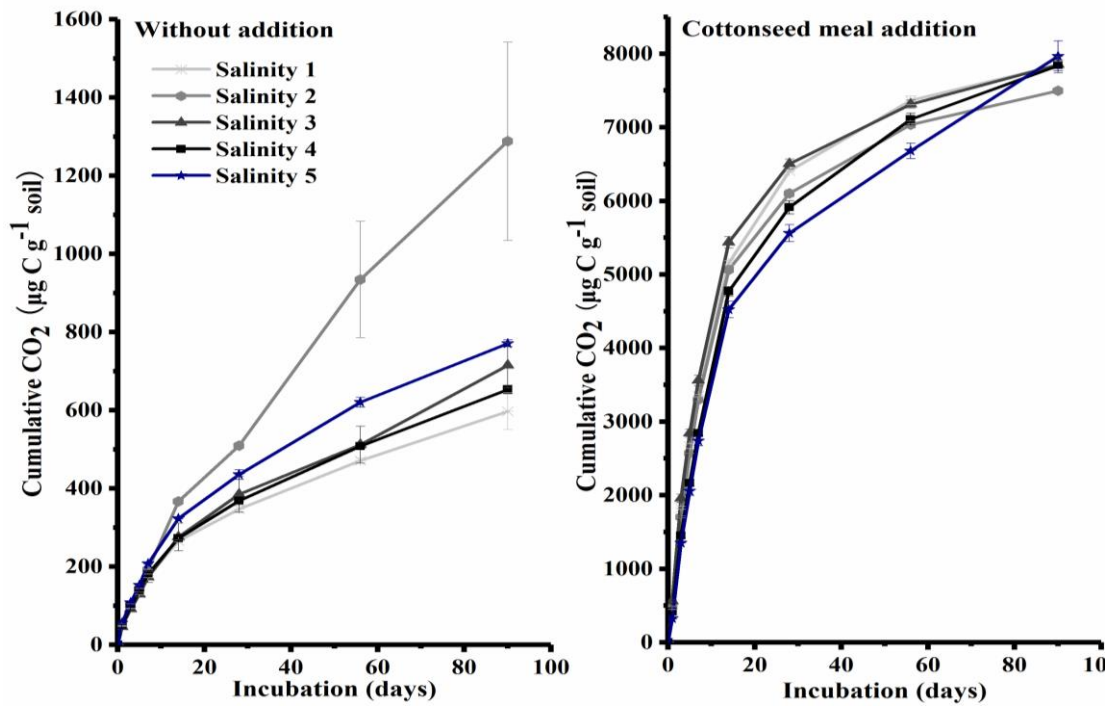

**Fig. S1.** Cumulative total amounts of CO<sub>2</sub> evolved in different five salinity soils during 90 days of incubation without addition and with cottonseed meal addition. Error bars represent standard errors of the means (n=3)

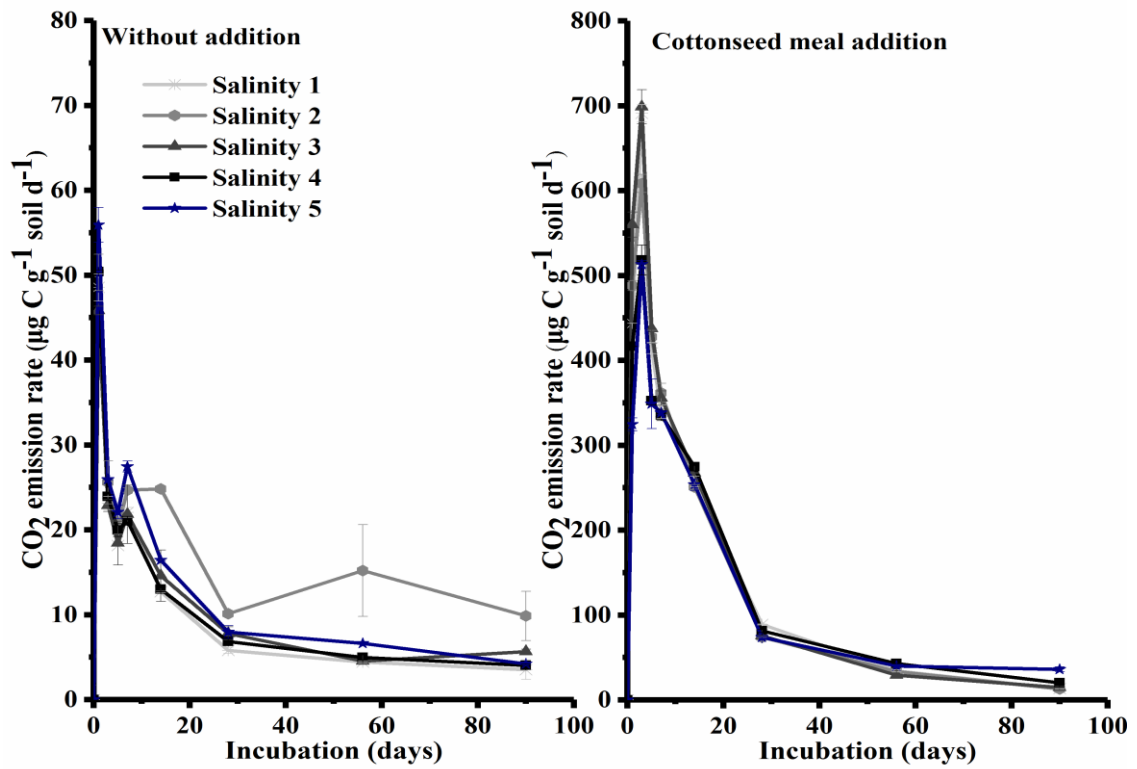

**Fig. S2.** Emission rate of CO<sub>2</sub> in different five salinity soils during 90 days incubation without addition and with cottonseed meal addition. Error bars represent standard errors of the means (n = 3).

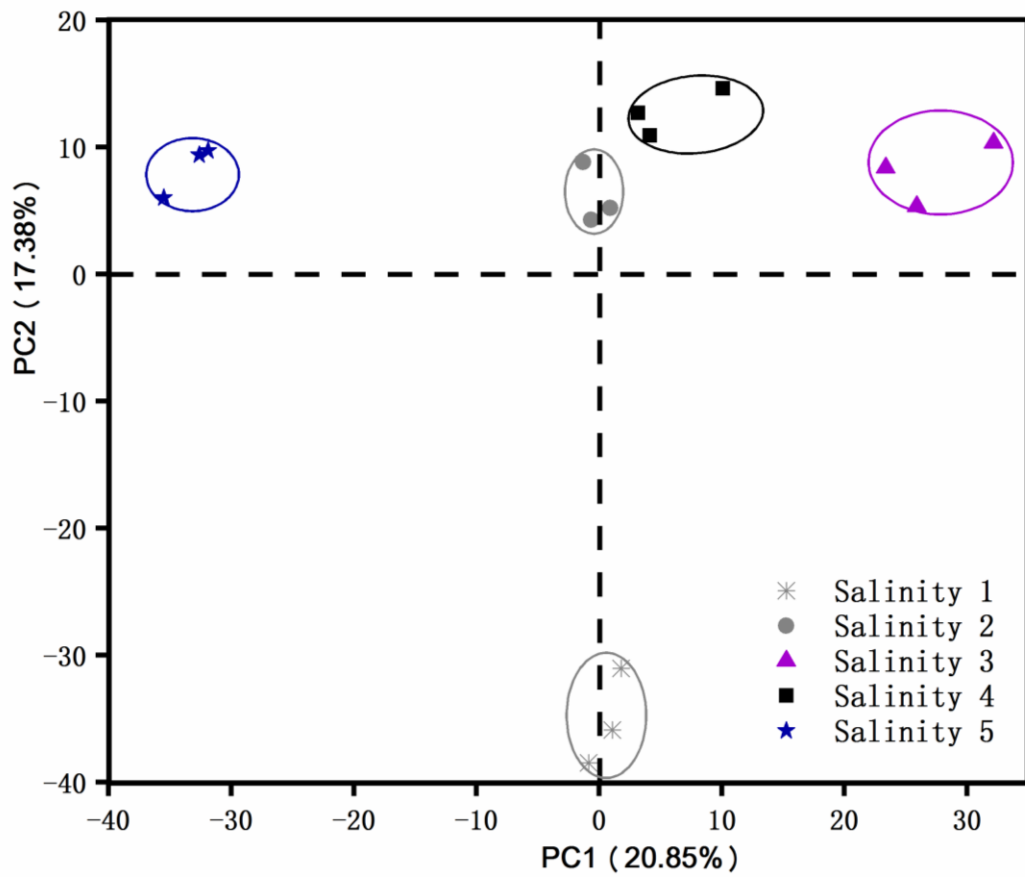

**Fig. S3.** PCA of the difference between five salinity soils, at 28 days.

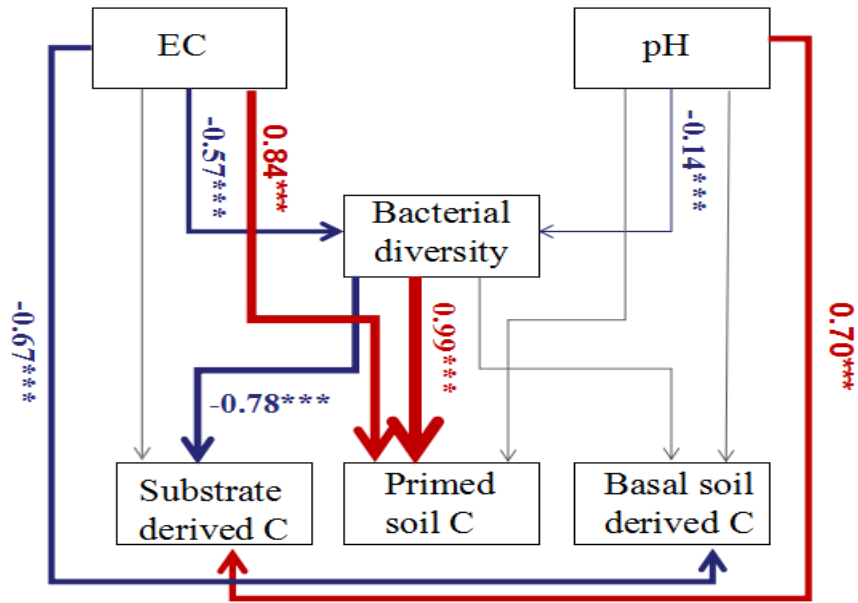

$$\chi^2 = 0.85, P = 0.65, GFI = 0.98, RMSEA < 0.001$$

**Fig. S4.** Path analysis detecting the underlying causal relationships between soil salinity physicochemical factors and microbial community composition of carbon dynamics in the soil system. Red lines indicate positive relationships, while blue lines indicate negative relationships. The width of arrows indicates the strength of significant standardized path coefficients ( $P < 0.05$ ). Paths with non-significant coefficients are presented as gray lines.  $***p < 0.001$ ;  $**p < 0.01$ ;  $*p < 0.05$ .
